# Supplementary material for: Stepwise Activation of the ATR Signaling Pathway upon Increasing Replication Stress Impacts Fragile Site Integrity
Source: PubMed Central journal article supplement (PMC3715430; doi:10.1371/journal.pgen.1003643), 2013-07-18

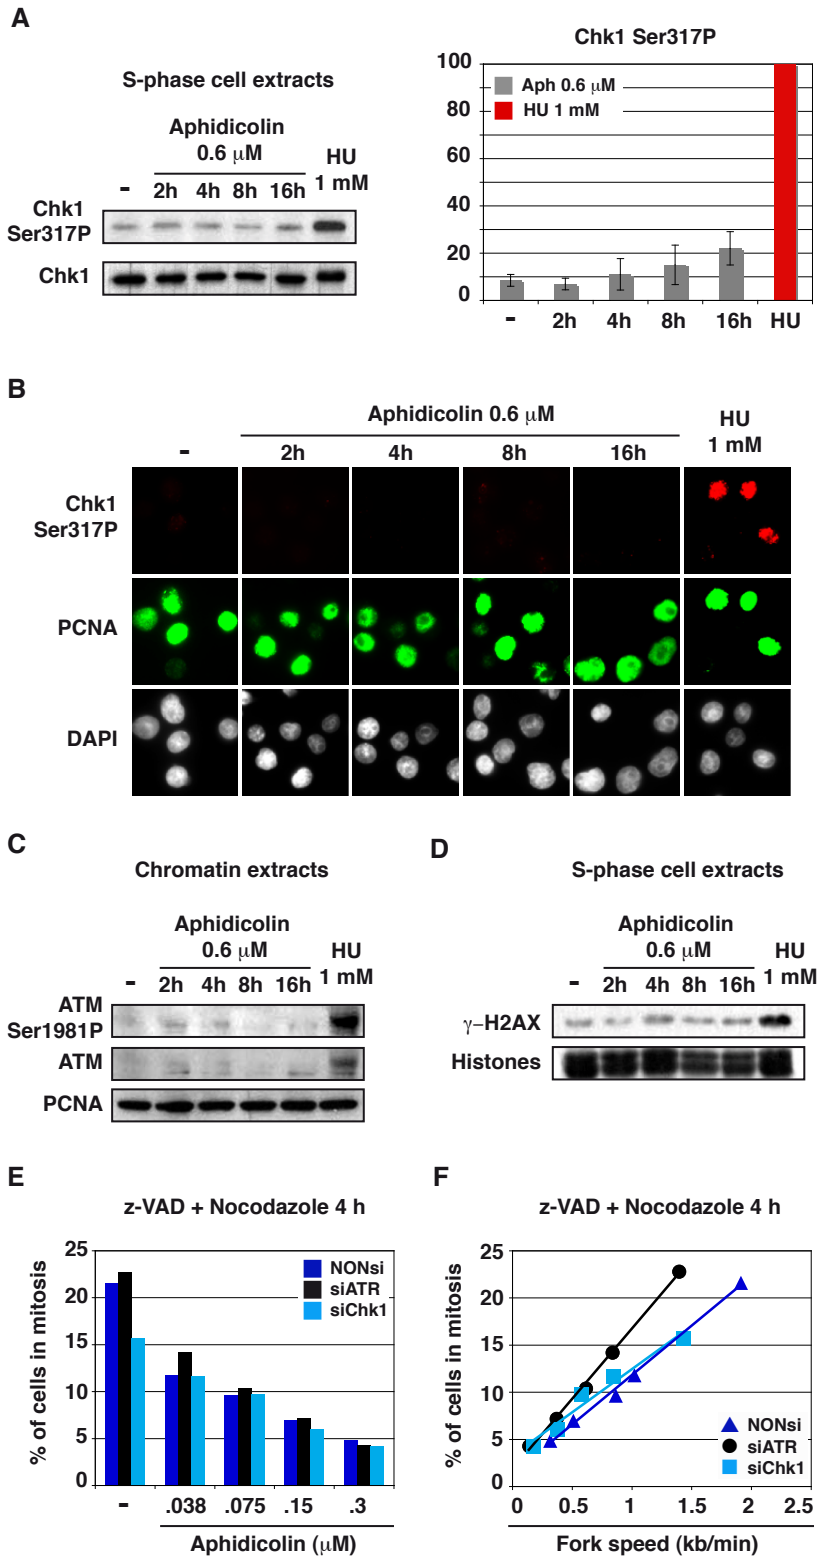

Supplement: pgen.1003643.s003.pdf [file pgen.1003643.s003.pdf]
